# Supplementary material for: Alteration of the DNA methylation status of donor cells impairs the developmental competence of porcine cloned embryos
Source: PubMed Central journal article supplement — J Reprod Dev. 2015 Nov 3;62(1):71–7. doi: 10.1262/jrd.2015-048 (PMC4768780; doi:10.1262/jrd.2015-048), 2015-11-03
Supplement: jrd-62-071-s001.pdf [file jrd-62-071-s001.pdf]

## Supplementary Materials

**Supplementary Table 1.** Detail of primers for bisulfite sequencing

| Gene     | Primer sequence (5'-3')                                        | Length<br>(bp) | Accession number |
|----------|----------------------------------------------------------------|----------------|------------------|
| CenRep   | F: GGTATTGTTGTTTGTGGTGATT<br>R: AAAATTTATTCCTCAAACCCAATTT      | 231            | Z75640           |
|          | Outer                                                          |                |                  |
| Thy1     | F: GGTAGGGAGGTTATGGAAGTTA<br>R: TAAATTCATTTACATTATAATACAACC    | 497            | NC_010451        |
|          | Inner                                                          |                |                  |
| Oct4     | F: GGAAAGGTTTTGGTTTTAAGG<br>R: TCCAAAACCTCTTAACATCCTACA        | 395            | NC_010449        |
|          | Outer                                                          |                |                  |
| Oct4     | F: ATTAGATTTGTGTGAGGATTTGAGAG<br>R: AAAACCCAATAAAAACCAAAACTCTC | 409            | NC_010449        |
|          | Inner                                                          |                |                  |
| Igf2/H19 | F: GTGTATAGAGTAGTGGAGAGGG<br>R: CCCAATCCCACCCACTAA             | 249            | AY044827         |
|          | Outer                                                          |                |                  |
| Igf2/H19 | F: GGTTTTAGGGGGATATTTTTT<br>R: TTAAAAAACATTACTIONCATATAC       | 384            | AY044827         |
|          | Inner                                                          |                |                  |
| Igf2/H19 | F: GATTTTTAGGTTTGTATTATTT<br>R: CAAATATTCAATAAAAAAACC          | 208            | AY044827         |
|          | Outer                                                          |                |                  |

Note: primers for CenRep or Igf2/H19 were from published papers [1, 2].

**Supplementary Table 2.** Detail of primers for quantitative real-time PCR

| Gene          | Primer sequence (5'-3')       | Length<br>(bp) | Accession number |
|---------------|-------------------------------|----------------|------------------|
| <i>Oct4</i>   | F: GAAGGTGTTTCAGCCAAACGAC     | 185            | NM_001113060     |
|               | R: CGATACTTGTCCGCTTTC         |                |                  |
| <i>Nanog</i>  | F: CCTCCATGGATCTGCTTATTC      | 209            | NM_001129971     |
|               | R: CATCTGCTGGAGGCTGAGGT       |                |                  |
| <i>Sox2</i>   | F: AACCAGAAGAACAGCCCAGAC      | 155            | NM_001123197     |
|               | R: TCCGACAAAAGTTTCCACTCG      |                |                  |
| <i>Dnmt1</i>  | F: GCGTCTTGCAGGCTGGTCAGTA     | 152            | NM_001032355     |
|               | R: CTTCTTATCATCGACCACGACGCT   |                |                  |
| <i>Dnmt3a</i> | F: ATGTGGTTCGGAGACGGCAAGT     | 195            | NM_001097437     |
|               | R: GCTCTCGTCGTTGTCATGGCA      |                |                  |
| <i>Igf2</i>   | F: CCGTGGCATCGTGGAAGAGTG      | 170            | NM_213883        |
|               | R: TCCAGGTGTCATAGCGGAAGAAC    |                |                  |
| <i>Thy1</i>   | F: AACCTACCATTGGCATCGCT       | 143            | NM_001146129     |
|               | R: TGAATGGGCAGGTTGGTGGT       |                |                  |
| <i>Col5a2</i> | F: AGATGTACTIONAACAGGGACATTTG | 124            | NM_001105289     |
|               | R: GTTATGGGGTCAGCACATTCAAGC   |                |                  |
| <i>Eif1a</i>  | F: AGATGAGGCTAGAAGTCTGAAGGC   | 113            | NM_001243218     |
|               | R: CAATGTCATCAAACACTGGATTCATC |                |                  |
| <i>ATP1b1</i> | F: CCACCAGGATTAACACAGATTCC    | 185            | NM_001001542     |
|               | R: TCTTTGAGTTCGCTGGGCAC       |                |                  |
| <i>Cdx2</i>   | F: GACAAGGACGTGAGCATGTATCC    | 220            | XM_003130908     |
|               | R: CGTAGCCGTTCCAGTCCTCG       |                |                  |

|               |                                                             |     |           |
|---------------|-------------------------------------------------------------|-----|-----------|
| <i>Bax</i>    | F: CAGTAACATGGAGCTGCAGAGG<br>R: GCCTTGAGCACCAGTTTACTGG      | 159 | AJ_606301 |
| <i>Bcl2l1</i> | F: CTGGTGGTTGACTTTCTCTCCTAC<br>R: GTTCCGCTTCTGATTCAGTCC     | 119 | NM_214285 |
| <i>β2m</i>    | F: CTTTCTACCTTCTGGTCCACACTG<br>R: GTGGTCTCGATCCCACTTAACTATC | 116 | NM_213978 |
| <i>18s</i>    | F: AATCTCGGGTGGCTGAACGC<br>R: CCGTTCTTAGTTGGTGGAGCGAT       | 143 | NR_002170 |

---

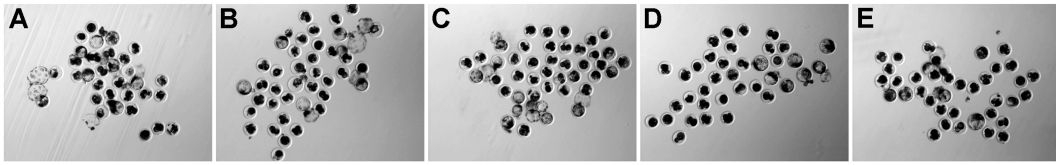

**Supplementary Fig. 1.** Cloned blastocysts ( $\times 40$ ) derived from untreated PFFs (A), PFFs treated with 10 nM 5-aza-dC (B) or PFFs treated with 1 uM (C), 2 uM (D) or 5 uM (E) 5-methyl-dCTP.

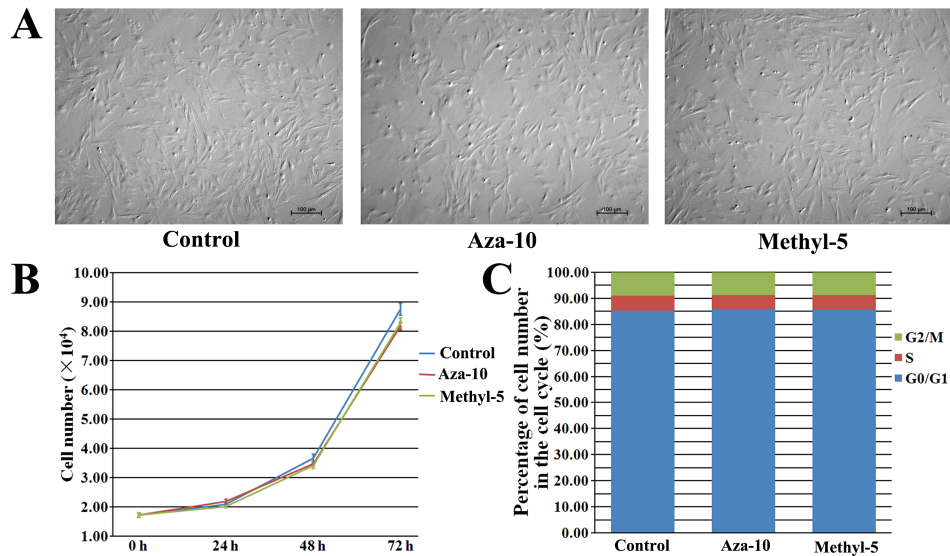

**Supplementary Fig. 2.** Cell morphology (A), cell proliferation (B) and cell cycle (C) of donor cells after treatment with 10 nM 5-aza-dC (aza-10) or 5 uM 5-methyl-dCTP (methyl-5).

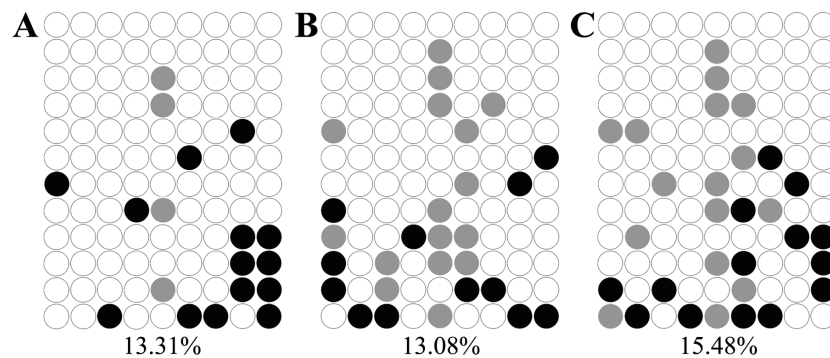

**Supplementary Fig. 3.** Methylation status of the *CenRep* region in cloned blastocysts of the control (A), aza-10 (B) or methyl-5 (C) group. Black or white circles represent methylated or unmethylated CpG sites, and gray circles represent mutated and/or single nucleotide polymorphism (SNP) variation

at certain CpG sites.

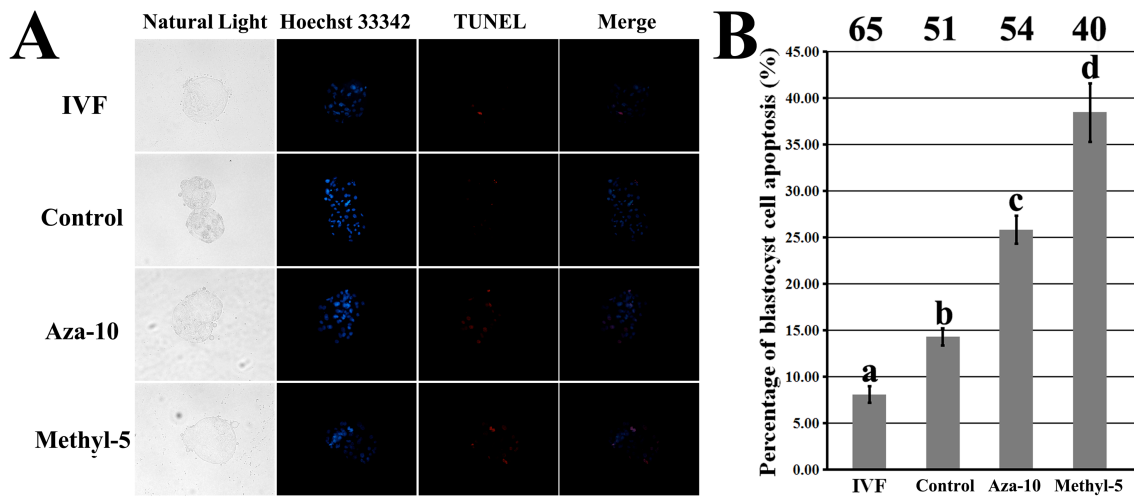

**Supplementary Fig. 4.** Blastocyst cell apoptosis after 5-aza-dC (aza-10) or 5-methyl-dCTP (methyl-5) treatment. A, the status of blastocyst cell apoptosis in the IVF, control, aza-10 or methyl-10 group; B, the percentage of blastocyst cell apoptosis in the IVF, control, aza-10 or methyl-10 group.

The images of blastocyst cell apoptosis were magnified (200×).

The number of blastocysts detected are indicated at the top of the column chart.

<sup>a-d</sup>Percentages (% ± SEM) in columns with different superscripts differed significantly ( $P < 0.05$ ).

## References

1. **Park CH, Kim HS, Lee SG, and Lee CK.** Methylation status of differentially methylated regions at *Igf2/H19* locus in porcine gametes and preimplantation embryos. *Genomics* 2009; 93: 179-186.
2. **Zhao MT, Rivera RM, and Prather RS.** Locus-specific DNA methylation reprogramming during early porcine embryogenesis. *Biol Reprod* 2013; 88: 48.
